# Supplementary material
Source: MDPI journal article supplement (https://www.mdpi.com/2073-4441/7/6/2796)
Supplement: s1 [file s1]

# Supplementary Information

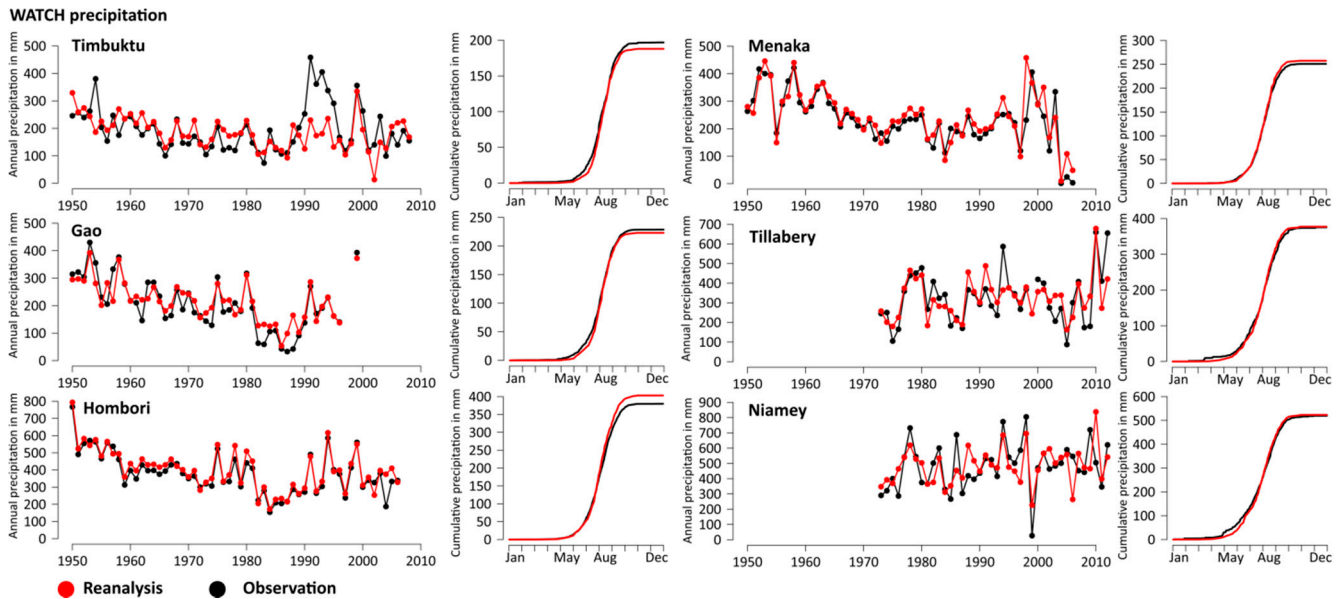

**Figure S1.** Comparison of precipitation of interpolated PGFv2 reanalysis data (**red**) with observations of six weather stations (**black**) in the research area. For each station the annual precipitation (**left**) and the cumulative sum of the precipitation of the whole period (**right**) is depicted.

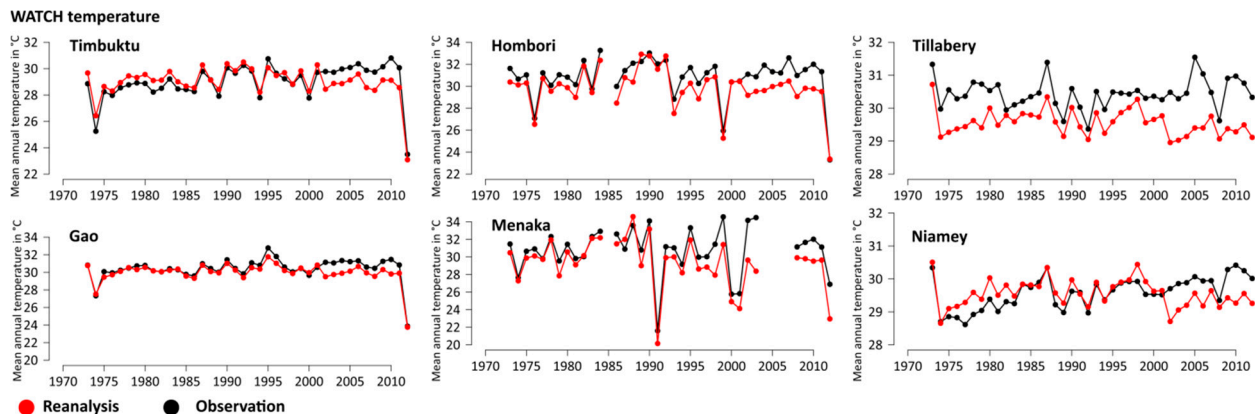

**Figure S2.** Comparison of mean annual temperature of interpolated WATCH reanalysis data (**red**) with observations of six weather stations (**black**) in the research area.

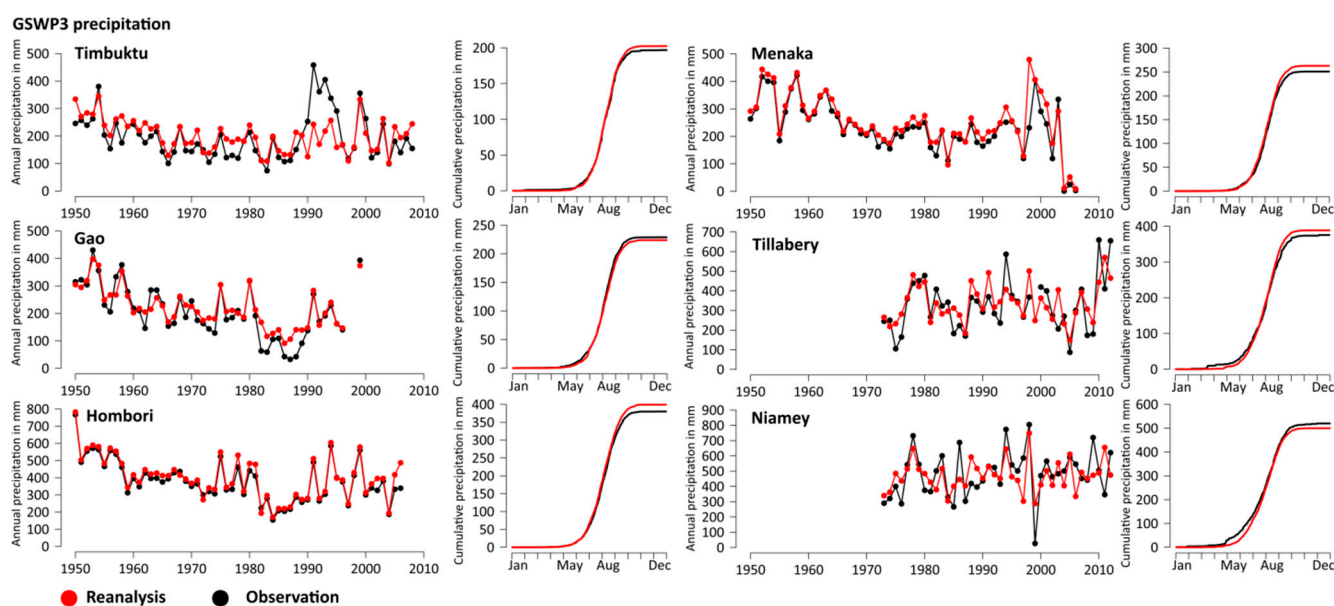

**Figure S3.** Comparison of precipitation of interpolated GSWP3 reanalysis data (red) with observations of six weather stations (black) in the research area. For each station the annual precipitation (**left**) and the cumulative sum of the precipitation of the whole period (**right**) is depicted.

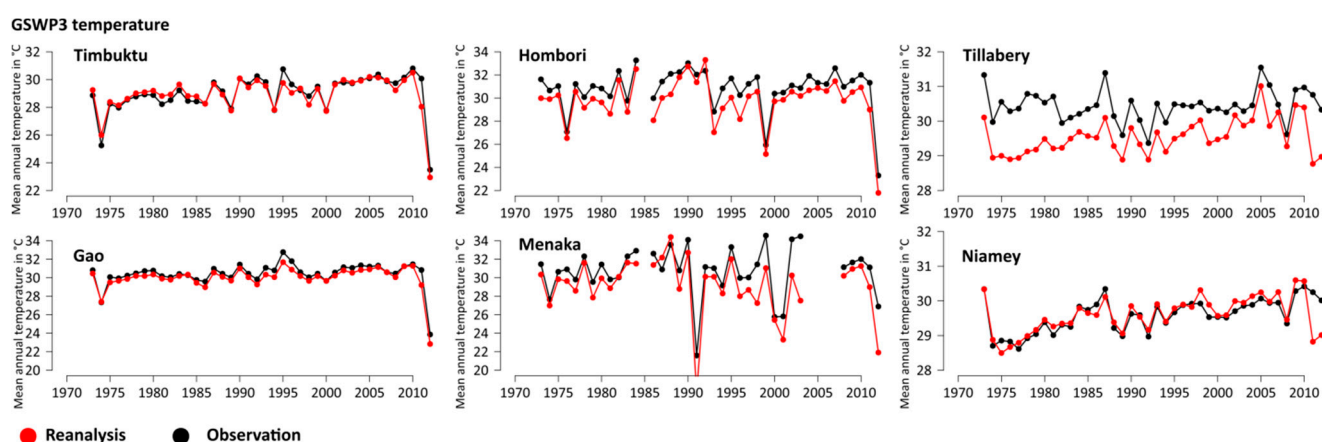

**Figure S4.** Comparison of mean annual temperature of interpolated GSWP3 reanalysis data (red) with observations of six weather stations (black) in the research area.
